# Supplementary material
Source: Springer Nature journal article supplement (https://www.springermedizin.de/resource/supplementary/12974_2007_98_MOESM5_ESM.pdf/9600766)

**A)**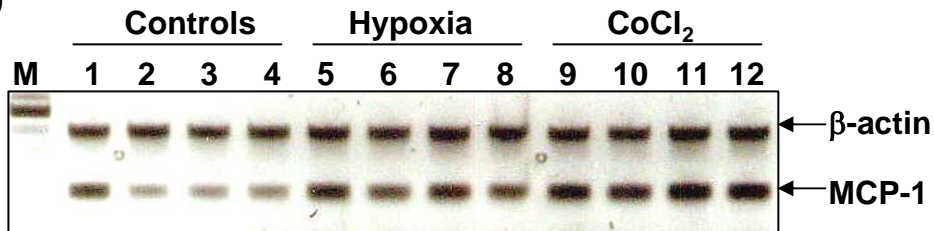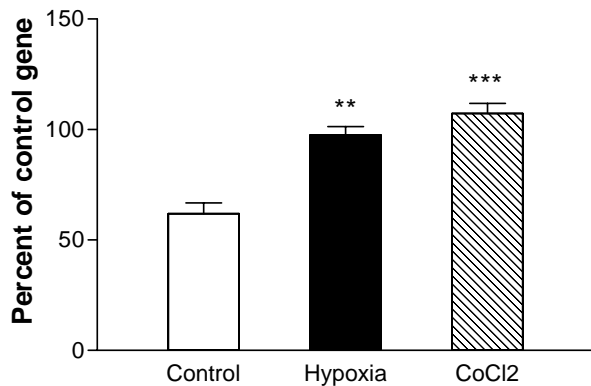**B)**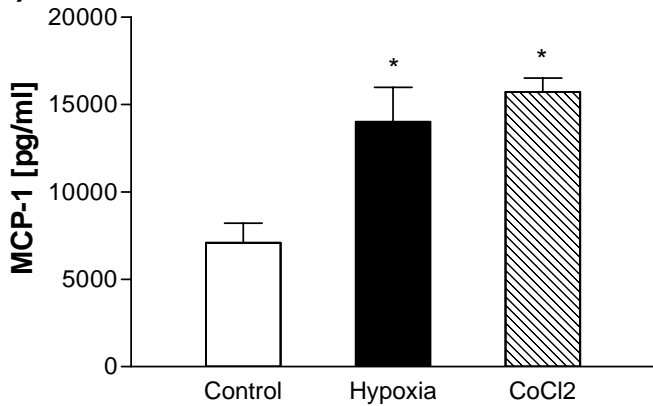

Supplement: MOESM5 [file 9600766]
